# Supplementary material for: Fungal Endophytes of Moringa (Moringa oleifera L.), Neem (Azadirachta indica) and Lavender (Lavandula angustifolia) and Their Biological Control of Fusarium Wilt of Banana
Source: MDPI journal article supplement (doi:10.3390/microbiolres14040143), 2023-12-15
Supplement: s1 [file s1]

## Supplementary Material

### Supplementary Tables

**Supplementary Table S1.** Fungal endophytes isolated from different parts of Moringa (*Moringa oleifera*), Neem (*Azadirachta indica*) and Lavender (*Lavandula angustifolia*)

| Plant                                      | Tissue           | Number of fungi isolated |
|--------------------------------------------|------------------|--------------------------|
| Moringa ( <i>Moringa oleifera</i> Lamarck) | Stem bark        | 14                       |
|                                            | Root             | 5                        |
|                                            | Flower           | 2                        |
|                                            | Seed             | 10                       |
|                                            | Leaf             | 1                        |
|                                            | <b>Sub-Total</b> | <b>32</b>                |
|                                            |                  |                          |
| Neem ( <i>Azadirachta indica</i> )         | Stem bark        | 11                       |
|                                            | Root             | 4                        |
|                                            | Flower           | 1                        |
|                                            | Seed             | 0                        |
|                                            | Leaf             | 4                        |
|                                            | <b>Sub-Total</b> | <b>20</b>                |
|                                            |                  |                          |
| Lavender ( <i>Lavandula angustifolia</i> ) | Stem bark        | 4                        |
|                                            | Root             | 3                        |
|                                            | Flower           | 4                        |
|                                            | Seed             | 0                        |
|                                            | Leaf             | 6                        |
|                                            | <b>Sub-Total</b> | <b>17</b>                |
| <b>Total</b>                               |                  | <b>69</b>                |



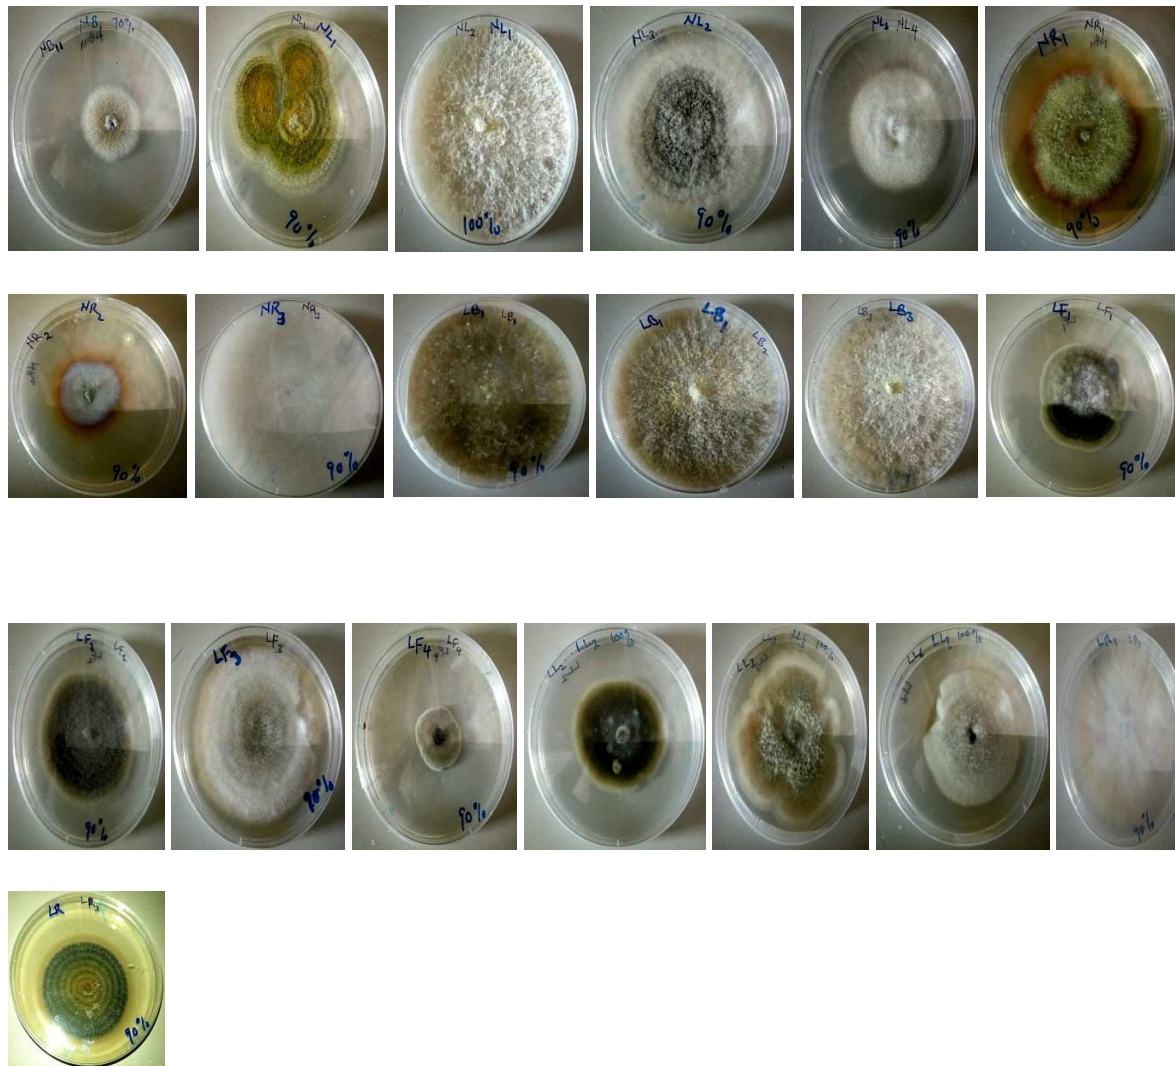

**Supplementary Figure S1.** Isolated fungal endophytes from plant tissues of *Moringa oleifera*, *Azadirachta indica* and *Lavandula angustifolia*.
